# Supplementary material
Source: PubMed Central journal article supplement (PMC6200593)
Supplement: NIHMS989834-supplement-Supplemental.pdf [file NIHMS989834-supplement-Supplemental.pdf]

# Two-Dimensional $\text{Ti}_3\text{C}_2$ MXene for High-Resolution Neural Interfaces

*Nicolette Driscoll,<sup>†,‡,#</sup> Andrew G. Richardson,<sup>‡,¶</sup> Kathleen Maleski,<sup>§,||</sup> Babak Anasori,<sup>§,||</sup> Oladayo Adewole,<sup>†,#</sup> Pavel Lelyukh,<sup>§,||</sup> Lilia Escobedo,<sup>□</sup> D. Kacy Cullen,<sup>†,#</sup> Timothy H. Lucas,<sup>‡,¶</sup> Yury Gogotsi,<sup>§,||</sup> and Flavia Vitale<sup>\*,‡,‡‡,#,Δ</sup>*

*\*Corresponding author: E-mail: [vitalef@pennmedicine.upenn.edu](mailto:vitalef@pennmedicine.upenn.edu)*

<sup>†</sup>Department of Bioengineering, University of Pennsylvania, Philadelphia, Pennsylvania 19104.

<sup>‡</sup>Center for Neuroengineering and Therapeutics, University of Pennsylvania, Philadelphia, Pennsylvania 19104.

<sup>¶</sup>Department of Neurosurgery, University of Pennsylvania, Philadelphia, Pennsylvania 19104.

<sup>§</sup>Department of Materials Science and Engineering, Drexel University, Philadelphia, Pennsylvania 19104.

<sup>||</sup>A.J. Drexel Nanomaterials Institute, Drexel University, Philadelphia, Pennsylvania 19104.

<sup>□</sup>School of Chemical and Biomolecular Engineering, Cornell University, Ithaca, NY 14853.

<sup>‡‡</sup>Department of Neurology, University of Pennsylvania, Philadelphia, Pennsylvania 19104.

<sup>#</sup>Center for Neurotrauma, Neurodegeneration, and Restoration, Corporal Michael J. Crescenz Veterans Affairs Medical Center, Philadelphia, PA 19104.

<sup>Δ</sup>Department of Physical Medicine & Rehabilitation, University of Pennsylvania, Philadelphia, Pennsylvania 19104.

## SUPPORTING INFORMATION

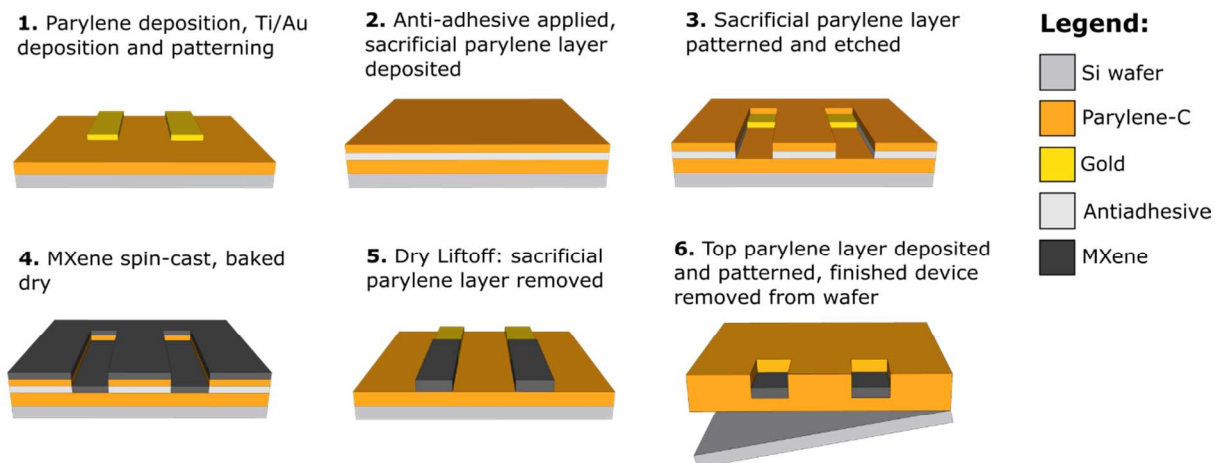

**Figure S1. Fabrication of multi-channel  $\text{Ti}_3\text{C}_2$  neural sensors.** Fabrication process: pattern metal traces and connection pads on bottom parylene-C layer; deposit an anti-adhesive layer (1% Micro 90) and a sacrificial parylene-C layer; etch pattern the sacrificial parylene-C layer; spin coat  $\text{Ti}_3\text{C}_2$  and thoroughly dry; peel up the sacrificial layer, leaving  $\text{Ti}_3\text{C}_2$  patterns behind; deposit top parylene-C layer; pattern and etch open electrode and Au bonding pad contacts; release completed device from wafer.

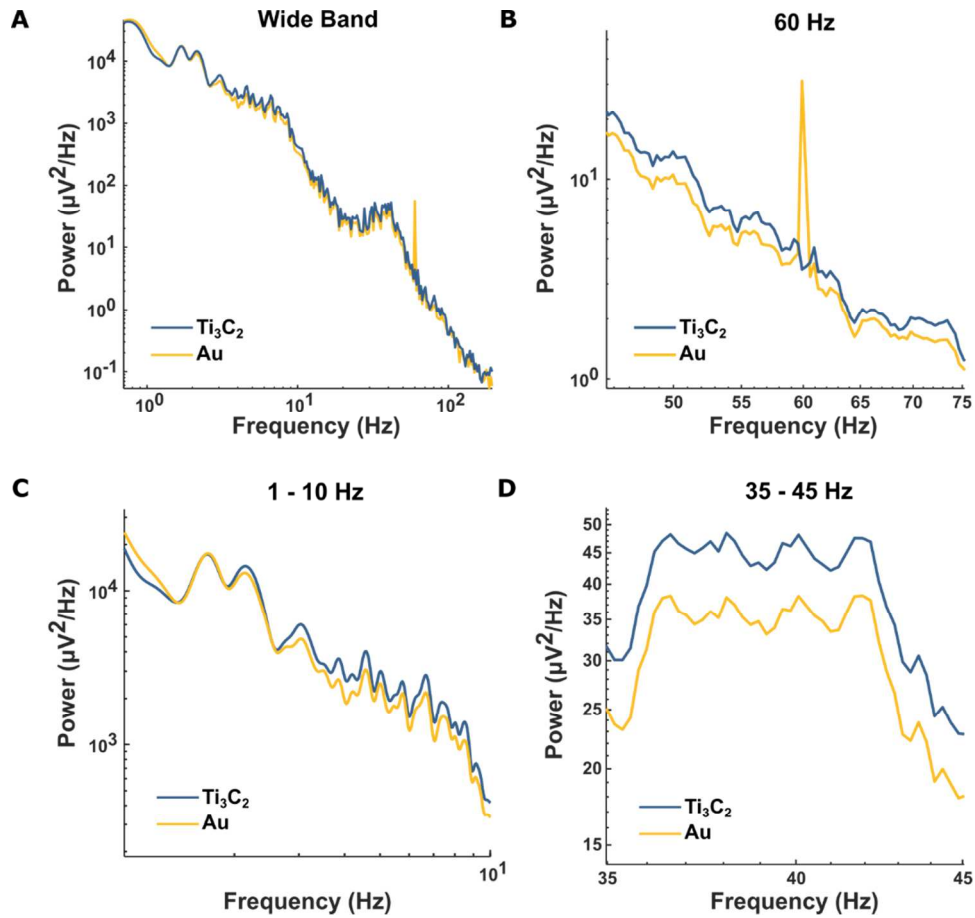

**Figure S2. *In vivo* noise characteristics.** (A) Wide band power spectral density from representative  $\text{Ti}_3\text{C}_2$  and Au electrodes from the intracortical array. (B) A significant peak in power at 60 Hz, attributed to mains noise, was seen on Au electrodes but was not observed on  $\text{Ti}_3\text{C}_2$  electrodes. (C,D)  $\text{Ti}_3\text{C}_2$  electrodes recorded higher power across a broad range of frequencies, including 1-10 Hz delta and theta rhythms (C) and 35-45 Hz gamma rhythms (D).
